# Supplementary material for: Specific in situ inflammatory states associate with progression to renal failure in lupus nephritis
Source: J Clin Invest. 2022 Jul 1;132(13):e155350. doi: 10.1172/JCI155350 (PMC9246394; doi:10.1172/JCI155350)
Supplement: Supplemental data [file jci-132-155350-s174.pdf]

## Supplementary Figures and Tables

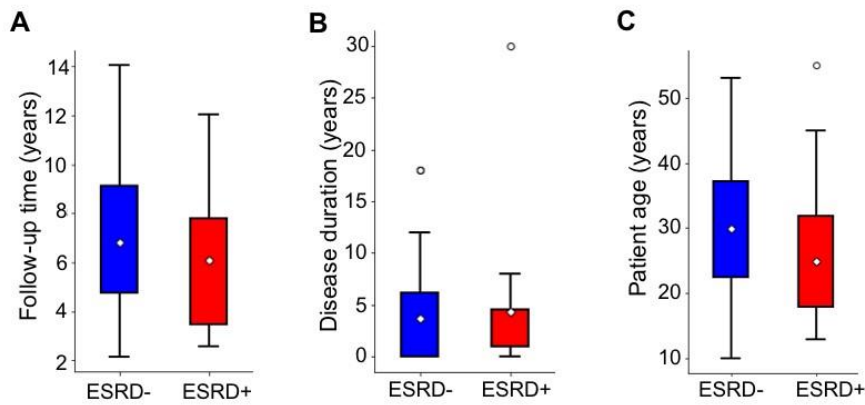

**Supplementary Figure 1. Clinical characteristics of patient cohort.** ESRD+ and ESRD- patients did not differ in A) Duration of follow up period ( $p=0.678$ ), B) Disease duration ( $p=0.819$ ), or C) Patient age ( $p=0.096$ ). (Mann-Whitney U Test with Bonferroni correction for multiple comparisons)

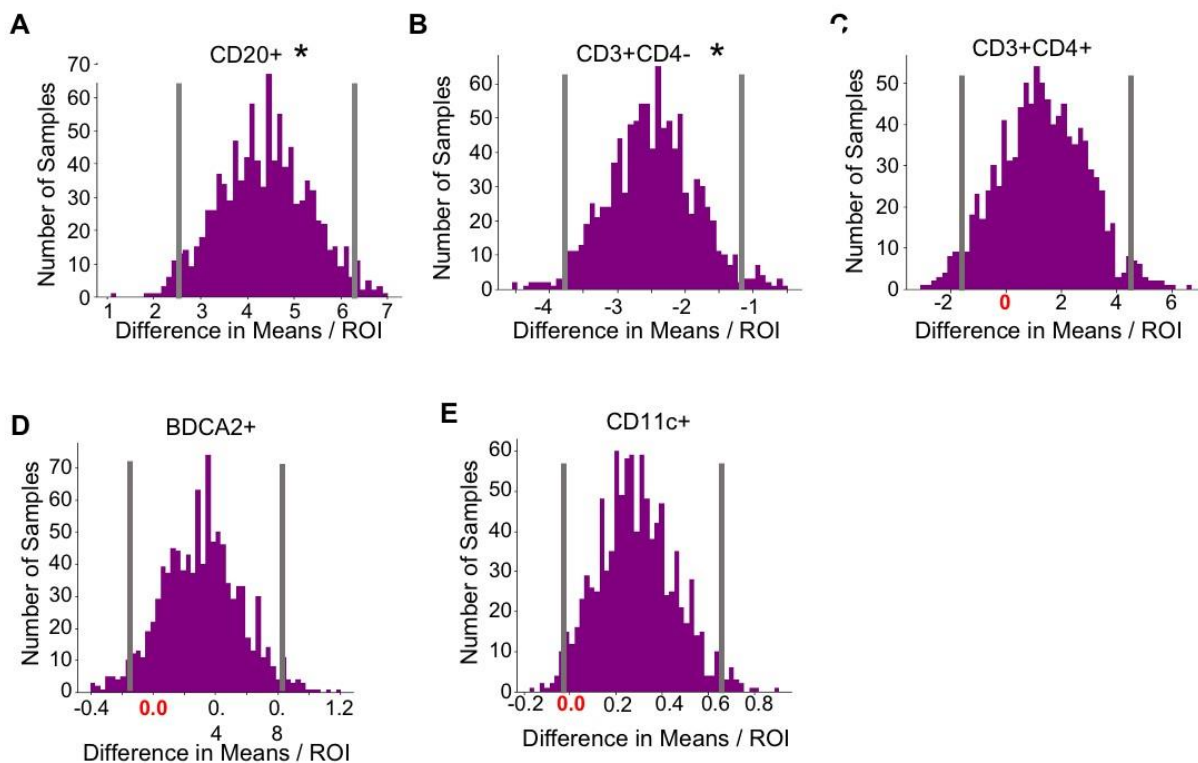

**Supplementary Figure 2. Distribution of the difference in means for indicated cells/ROI comparing ESRD+ vs ESRD-.** Difference in means for all iterations of bootstrapping are shown for A) CD20+, B) CD3+CD4-, C) CD3+CD4+. D) CD11c+, E) BDCA2+ cells. Vertical grey lines denote 95% confidence intervals, stars denote the confidence intervals that do not overlap with zero.

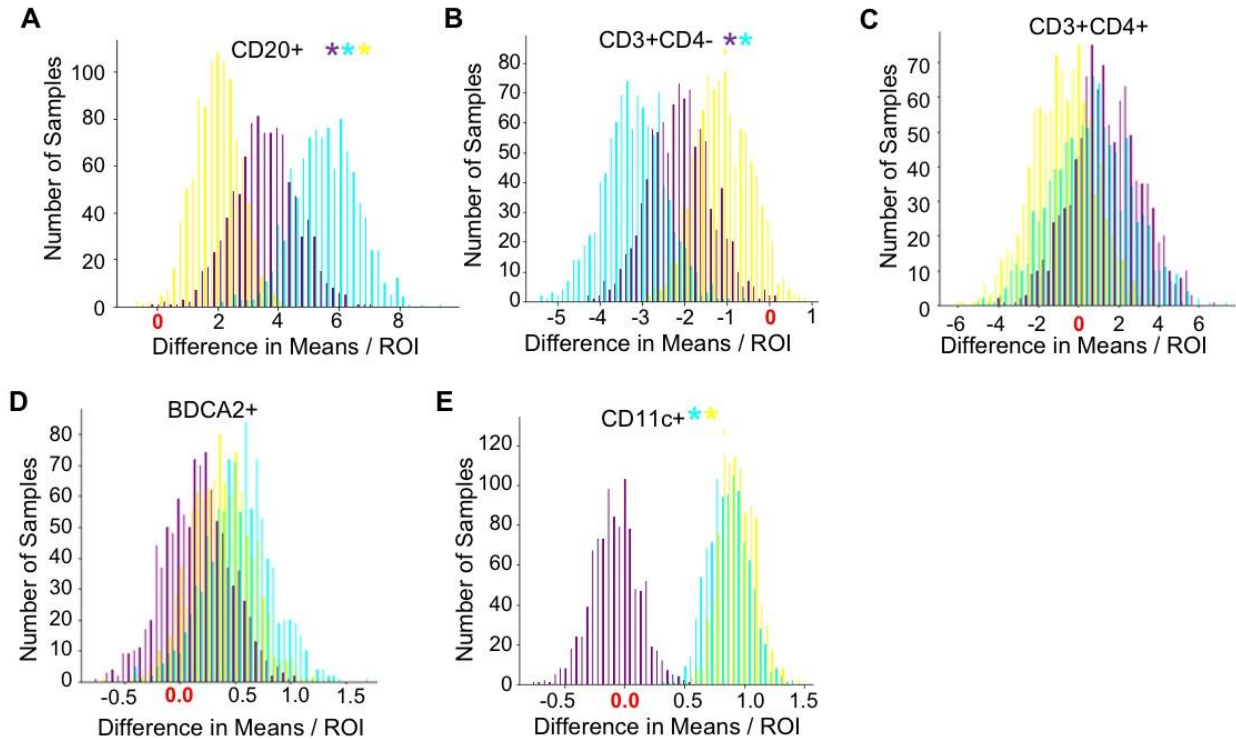

**Supplementary Figure 3. Distribution of the difference in means for indicated cells.** Difference in means for each bootstrapping iteration comparing ESRD+ vs ESRD- (purple), ESRD+ vs ESRD current (cyan), and ESRD- vs current (yellow) for A) CD20+, B) CD3+CD4-, C) CD3+CD4+. D) CD11c+, E) BDCA2+ cells. Stars denote the confidence intervals that do not overlap with zero, colors correspond with the comparison.

A

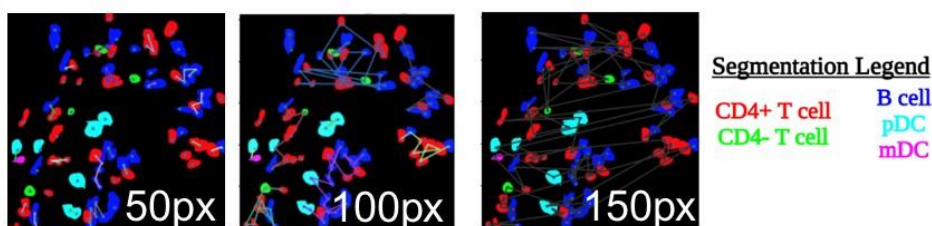

B

|                             |                                                                                                                                                                                     |                       |                                                                                                                                                                                                                                                                                                                                                                                                                                            |
|-----------------------------|-------------------------------------------------------------------------------------------------------------------------------------------------------------------------------------|-----------------------|--------------------------------------------------------------------------------------------------------------------------------------------------------------------------------------------------------------------------------------------------------------------------------------------------------------------------------------------------------------------------------------------------------------------------------------------|
| Cell Frequencies            | <ul style="list-style-type: none"> <li>B cell count</li> <li>CD4- T cell count</li> <li>CD4+ T cell count</li> <li>mDC count</li> <li>pDC count</li> </ul>                          | Cell Frequency Ratios | <ul style="list-style-type: none"> <li>B cell count / CD4- T cell count</li> <li>B cell count / CD4+ T cell count</li> <li>B cell count / mDC count</li> <li>B cell count / pDC count</li> <li>mDC count / CD4- T cell count</li> <li>mDC count / CD4+ T cell count</li> <li>mDC count / pDC count</li> <li>pDC count / CD4- T cell count</li> <li>pDC count / CD4+ T cell count</li> <li>CD4- T cell count / CD4+ T cell count</li> </ul> |
| Cell Proportions            | <ul style="list-style-type: none"> <li>B cell proportion</li> <li>CD4- T cell proportion</li> <li>CD4+ T cell proportion</li> <li>mDC proportion</li> <li>pDC proportion</li> </ul> |                       |                                                                                                                                                                                                                                                                                                                                                                                                                                            |
| Neighborhood Shape Features | <ul style="list-style-type: none"> <li>Neighborhood area</li> </ul>                                                                                                                 | Cell Shape Features   | <ul style="list-style-type: none"> <li>Mean circularity</li> <li>Mean eccentricity</li> <li>Mean major/minor axis ratio</li> </ul>                                                                                                                                                                                                                                                                                                         |

C

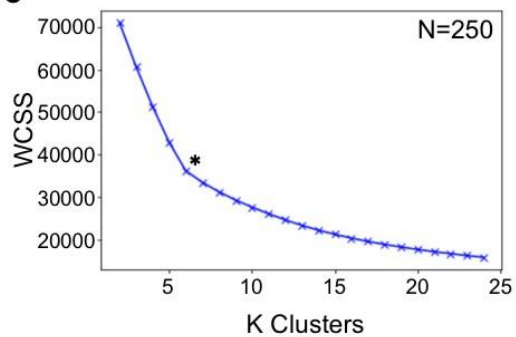

D

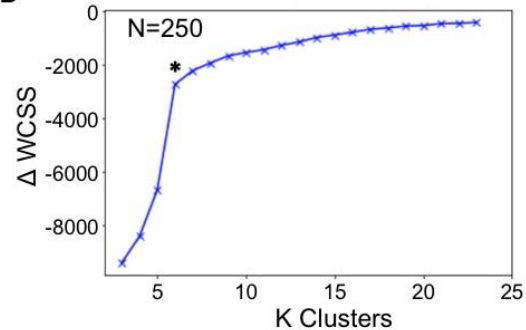

**Supplementary Figure 4. Definition of cell neighborhoods in the HR dataset.** A) Representative outputs of DBSCAN algorithm with varying distance cutoffs (50, 100, and 150 pixels), B) 24 features used to define types of aggregates, results of bootstrapping method for determination of optimal cluster number using C) within cluster sum of distances squared (WCSS) and D) delta WCSS. The optimal cluster hyperparameter used for downstream analyses ( $k = 6$ ), is denoted by an asterisk.

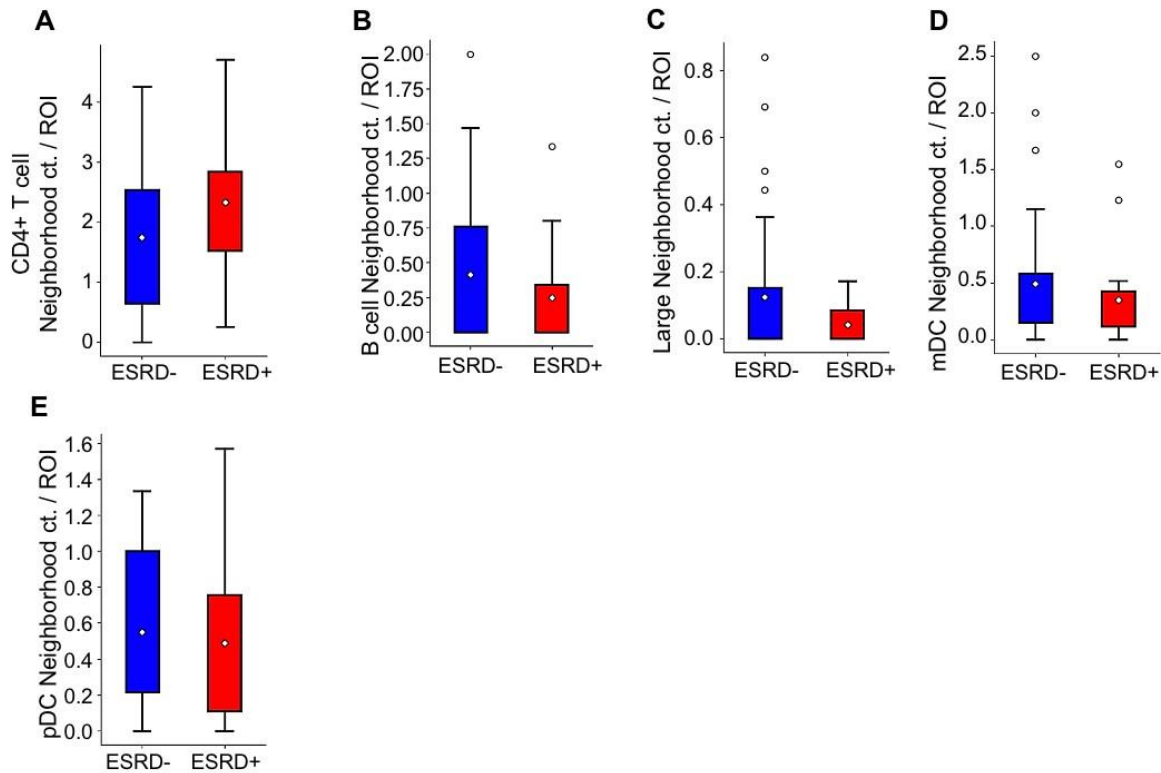

**Supplementary Figure 5. Other cellular neighborhoods not associated with renal failure.** The abundance of neighborhoods between the patient cohorts, normalized by the number of ROIs per patient, is compared by Mann-Whitney U Test, with a Bonferroni correction for A) CD4+ T cell neighborhoods, B) B cell neighborhoods, C) Large neighborhoods, D) mDC neighborhoods, E) pDC neighborhoods

**A**

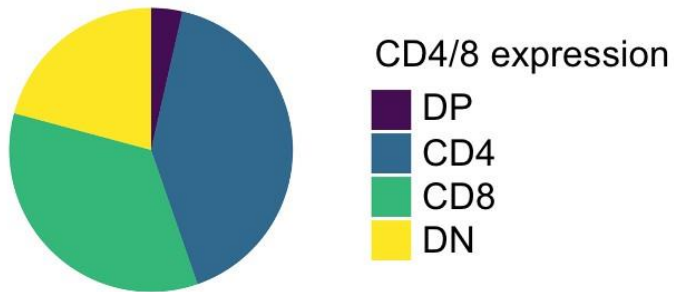

**B**

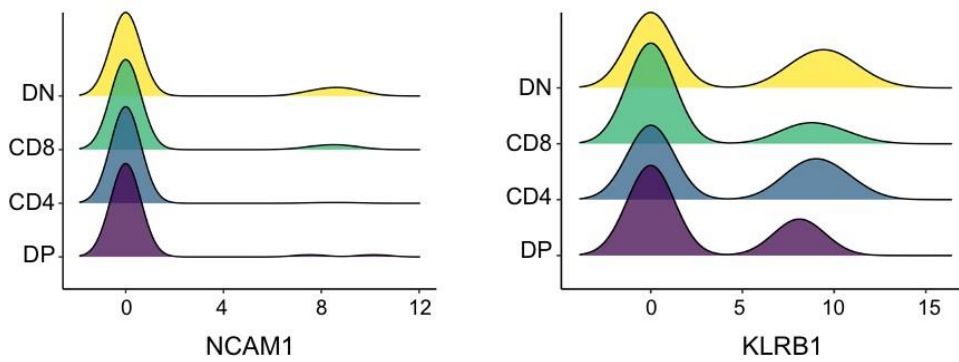

**Supplementary Figure 6. DN T cells are found in scRNA-Seq LN data.** A) Distribution of *CD4/8A/8B* expression in T cell population. DP: double-positive, DN: double-negative; B) Density plots showing distribution of *NCAM1* and *KLRB1* expression.



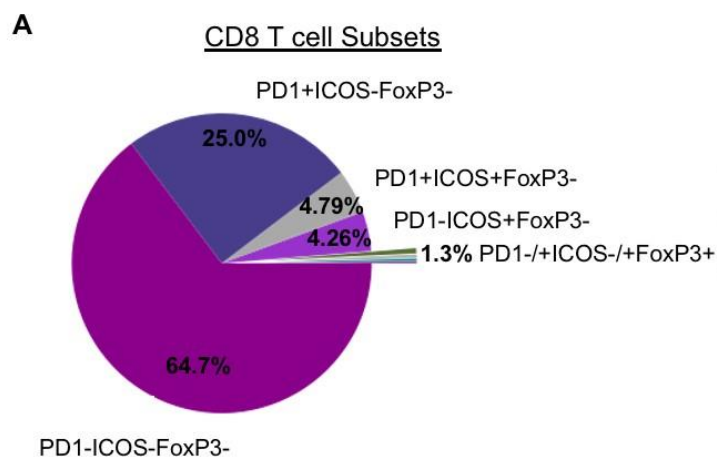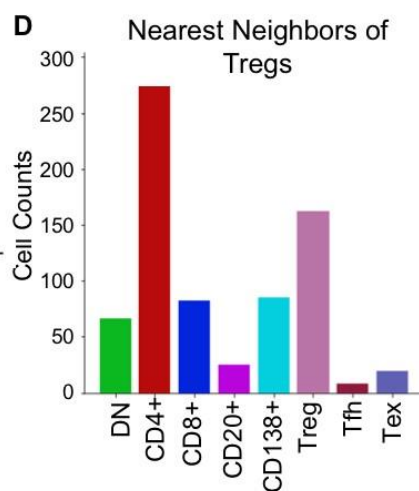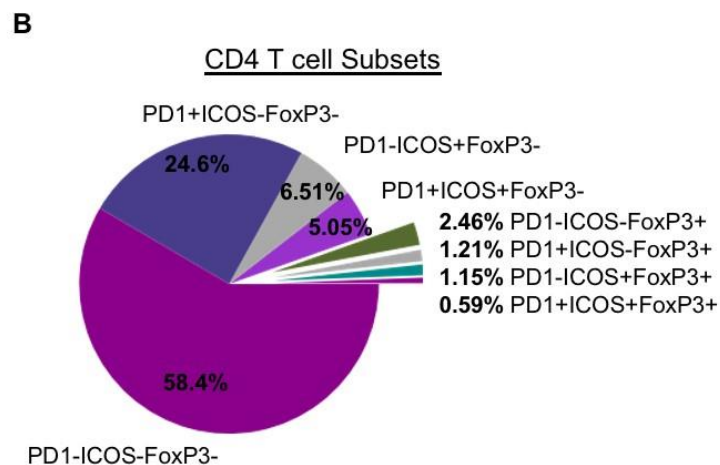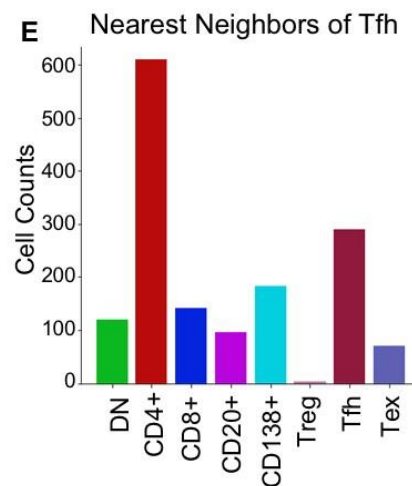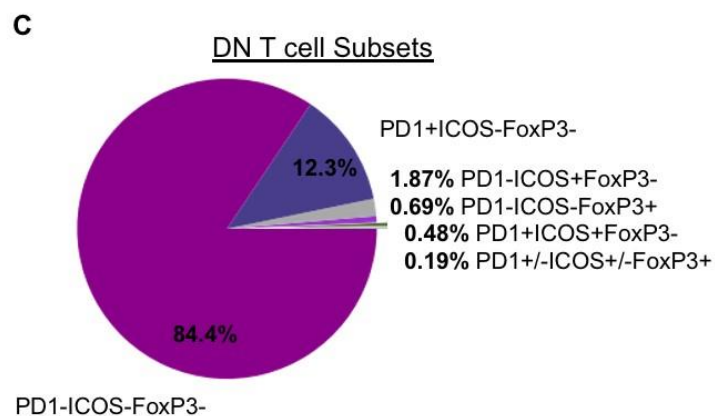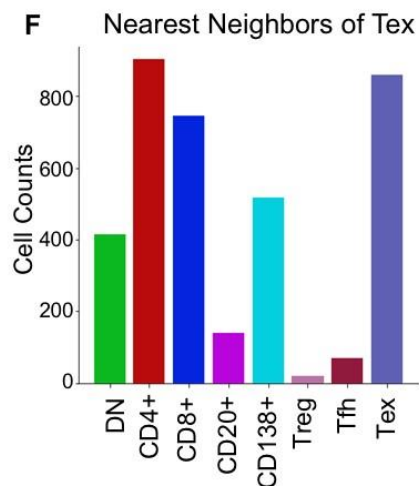

**Supplementary Figure 7. CD8, CD4, and DN T cell phenotypes in LN.** Distribution of secondary marker (ICOS, PD1, FoxP3) expression in A) CD8+, B) CD4+ and C) DN T cells, Distribution of nearest neighbors of D) Treg (CD3+CD4+PD1-ICOS-FoxP3+) cells, E) Tfh (CD3+CD4+PD1+ICOS+/-FoxP3+) cells, and F) Tex (CD3+CD4+PD1+ICOSFoxP3-)

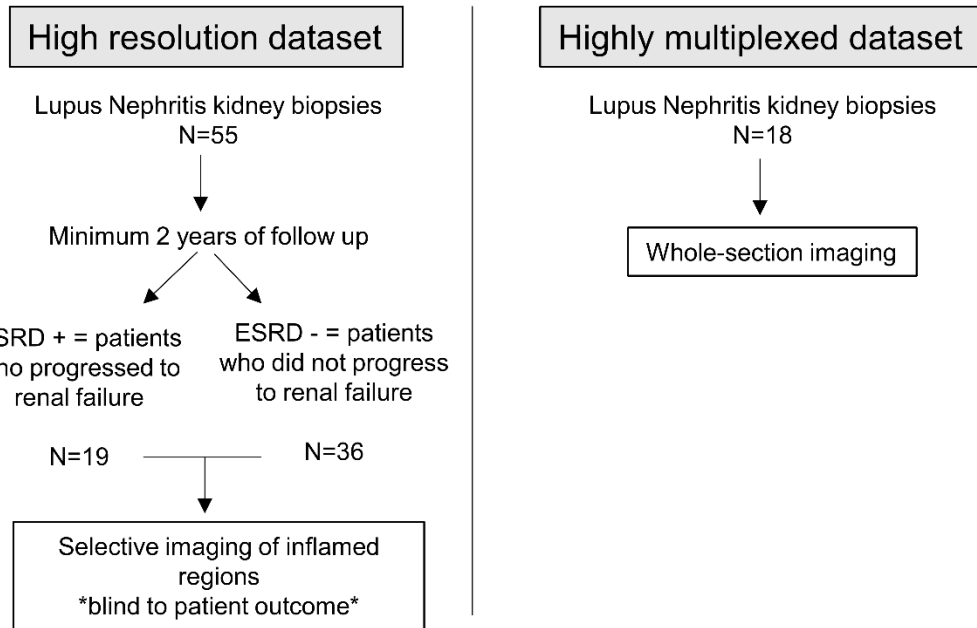

**Supplementary Figure 8. Schematic of data acquisition.** Left: Sample selection for the high resolution dataset. Right: Sample selection for the highly multiplexed dataset.

**Supplementary Table 1 attached as an excel sheet**

**Supplementary Table 2.** Selected clinical features from longitudinal patient cohort stratified by ESRD status.

| Feature                     | ESRD(n=36) | ESRD+<br>(n=19) | p-value<br>( <i>Chi-square test for independence</i> ) |
|-----------------------------|------------|-----------------|--------------------------------------------------------|
| <b>Sex</b>                  |            |                 | 0.822                                                  |
| <i>Female</i>               | 33 (92%)   | 17 (89%)        |                                                        |
| <i>Male</i>                 | 3 (8%)     | 2 (11%)         |                                                        |
| <b>Race</b>                 |            |                 | 0.103                                                  |
| <i>African American</i>     | 29 (81%)   | 19 (100%)       |                                                        |
| <i>Non-African American</i> | 7 (19%)    | 0 (0%)          |                                                        |
| <b>Induction</b>            |            |                 | 0.628                                                  |
| <i>Cyclophosphamide</i>     | 15 (42%)   | 9 (47%)         |                                                        |

|                                                  |          |          |                               |
|--------------------------------------------------|----------|----------|-------------------------------|
| MMF                                              | 14 (39%) | 5 (26%)  |                               |
| <i>Pre-biopsy plaquenil</i>                      | 18 (50%) | 13 (68%) | 0.306                         |
| <i>Pre-biopsy MMF</i>                            | 8 (22%)  | 9 (47%)  | 0.136                         |
| <i>Pre-biopsy prednisone &gt;20 mg</i>           | 8 (22%)  | 5 (26%)  | 0.995                         |
| <i>Pre-biopsy azathioprine</i>                   | 0 (0%)   | 2 (11%)  | 0.11                          |
| <i>Ace inhibitor/ARB</i>                         | 28 (78%) | 8 (42%)  | <b>6.37x10<sup>-4</sup> *</b> |
| <i>Class 5 glomerulonephritis</i>                | 19 (53%) | 8 (42%)  | 0.639                         |
| <i>Proliferative glomerulonephritis</i>          | 29 (81%) | 16 (84%) | 0.973                         |
| <i>Moderate-Severe TI score (&gt;1)</i>          | 21 (58%) | 17 (89%) | <b>0.0385 *</b>               |
| <i>Moderate-Severe chronicity score (&gt;=4)</i> | 7 (19%)  | 14 (74%) | <b>2.67x10<sup>-4</sup> *</b> |
| <i>Hypertension</i>                              | 17 (47%) | 12 (63%) | 0.400                         |
| <i>dsDNA</i>                                     | 30 (83%) | 18 (95%) | 0.435                         |
| <i>Doubled serum creatinine during follow-up</i> | 9 (25%)  | 10 (52%) | 0.0799                        |

**Supplementary Table 3.** F1-scores for individual cell classes in the HR dataset for lymphocyte network (trained only for T and B cells), the DC network, and the combined predictions.

|             | Lymphocyte Network | DC Network  | Joint Predictions |
|-------------|--------------------|-------------|-------------------|
| CD4+ T cell | 0.75               | --          | 0.78              |
| CD4- T cell | 0.69               | --          | 0.69              |
| B cell      | 0.84               | --          | 0.88              |
| pDC         | --                 | 0.69        | 0.79              |
| mDC         | --                 | 0.52        | 0.48              |
| Overall     | <b>0.76</b>        | <b>0.62</b> | <b>0.74</b>       |

**Supplementary Table 4.** Mean minimum distances of lymphocyte classes to structures in lupus nephritis kidney biopsies in the HMP dataset.

| Cell type   | Mean minimum distance to glomerulus (μm) | Mean minimum distance to tubule (μm) |
|-------------|------------------------------------------|--------------------------------------|
| DN T cell   | 294.61                                   | 17.82                                |
| CD4+ T cell | 292.89                                   | 18.91                                |

|                    |        |       |
|--------------------|--------|-------|
| CD8+ T cell        | 299.08 | 16.58 |
| CD20+ B cell       | 296.42 | 19.39 |
| CD138+ plasma cell | 299.32 | 15.18 |

**Supplementary Table 5.** P-values from a statistical comparison of cell class distances to glomeruli and tubules. All p-values represent the significance level of a Mann-Whitney U-Test. Significant values are underlined and bold.

| Comparison       | Glomerular Proximity                   | Tubular Proximity                   |
|------------------|----------------------------------------|-------------------------------------|
| DN vs. CD4+      | 0.0879                                 | $\underline{1.27 \times 10^{-14}}$  |
| DN vs. CD8+      | 0.279                                  | $\underline{2.07 \times 10^{-7}}$   |
| DN vs. CD20+     | 0.121                                  | $\underline{1.22 \times 10^{-6}}$   |
| DN vs. CD138+    | $\underline{1.26 \times 10^{-8}}$      | $\underline{1.30 \times 10^{-68}}$  |
| CD4+ vs. CD8+    | <b><math>\underline{0.0154}</math></b> | $\underline{8.26 \times 10^{-49}}$  |
| CD4+ vs. CD20+   | $\underline{7.45 \times 10^{-3}}$      | 0.402                               |
| CD4+ vs. CD138+  | $\underline{9.89 \times 10^{-21}}$     | $\underline{2.01 \times 10^{-223}}$ |
| CD8+ vs. CD20+   | 0.265                                  | $\underline{9.29 \times 10^{-19}}$  |
| CD8+ vs. CD138+  | $\underline{2.03 \times 10^{-7}}$      | $\underline{3.36 \times 10^{-42}}$  |
| CD20+ vs. CD138+ | $\underline{5.47 \times 10^{-4}}$      | $\underline{8.80 \times 10^{-70}}$  |

**Supplemental Table 6.** Anti-CD20(Agilent, M0755), anti-CD4(Abcam, ab133616), antiCD3(BIO-RAD, MCA1477), anti-BDCA2(R&D, AF1376), and anti-CD11c (Abcam, ab52632) were applied for high-resolution images. For high-dimensional images, more antibodies were added, including anti-CD8(Abcam, ab17147), anti-ICOS(Abcam, ab105227), anti-PD1(Abcam, ab52587), anti-Foxp3(Invitrogen, 14-4776-82), antiCD138(Invitrogen, MA5-12400), anti-MX1(R&D, AF7946), and anti-TCRd(Santa Cruz, sc-100289). DAPI (Invitrogen, H3570) was used for nuclear staining.

| Target | Vendor  | Catalog# |
|--------|---------|----------|
| CD20   | Agilent | M0755    |
| CD4    | Abcam   | ab133616 |
| CD3    | BIO-RAD | MCA1477  |
| BDCA2  | R&D     | AF1376   |
| CD11c  | Abcam   | ab52632  |
| CD8    | Abcam   | ab17147  |

|       |            |            |
|-------|------------|------------|
| ICOS  | Abcam      | ab105227   |
| PD1   | Abcam      | ab52587    |
| FoxP3 | Invitrogen | 14-4776-82 |
| CD138 | Invitrogen | MA5-12400  |
| MX1   | R&D        | AF7946     |
| TCRd  | Santa Cruz | sc-100289  |
| DAPI  | Invitrogen | H3570      |

---
